# Supplementary material for: The Molecular Basis and Biologic Significance of the β-Dystroglycan-Emerin Interaction
Source: PubMed Central journal article supplement (PMC7504044; doi:10.3390/ijms21175944), 2020-08-19
Supplement: ijms-21-05944-s001.pdf [file ijms-21-05944-s001.pdf]

# Supplementary Figure 1

**A**

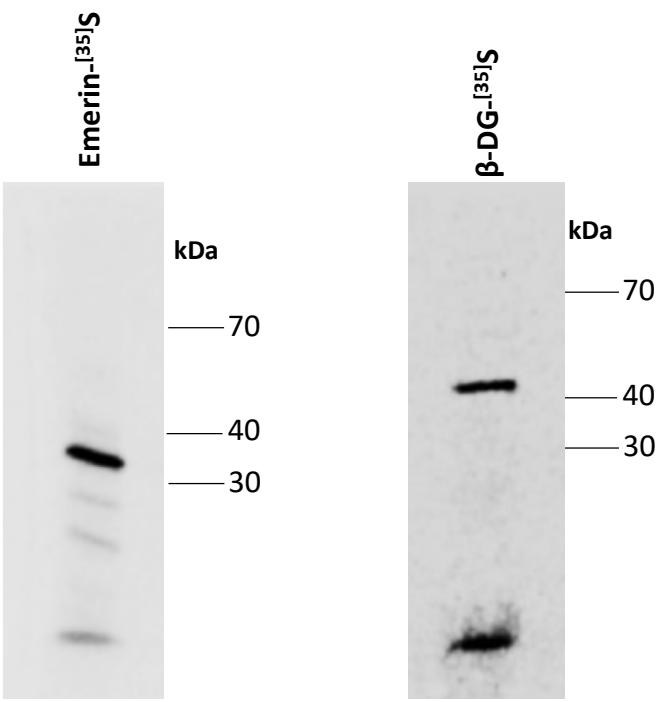

# Supplementary Figure 2

A

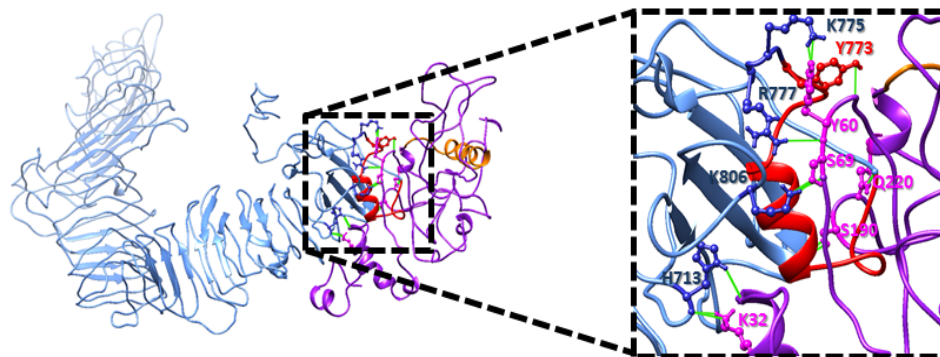

**Supplementary Figure 2.** Docking of full-length Emerin (light blue) and  $\beta$ -DG (purple) protein structures where their transmembrane domains (Emerin-TM in red,  $\beta$ -DG-TM in orange) are closer to each other. Contacting/clashing residues are displayed in *ball-and-stick* conformation (Emerin in magenta,  $\beta$ -DG in dark blue) and their position is also indicated. The interactions (clashes/contacts) are indicated by green lines.
